# Supplementary material for: Thermoelectric behavior of (Ba0.2Sr0.2Ca0.2La0.2Na0.2)CoO3 high entropy cobaltate-based perovskite
Source: Royal Society of Chemistry journal article supplement (doi:10.1039/d4cp03550j), 2024-01-01
Supplement: d4cp03550j1.pdf [file d4cp03550j1.pdf]

## Supporting Information

### Thermoelectric behavior of $(\text{Ba}_{0.2}\text{Sr}_{0.2}\text{Ca}_{0.2}\text{La}_{0.2}\text{Na}_{0.2})\text{CoO}_3$ high entropy cobaltate-based perovskite

Tathagata Bhattacharya, Ritwik Banerjee and Tanmoy Maiti\*

Plasmonics and Perovskite Laboratory, Department of Materials Science and Engineering,

IIT Kanpur, UP 208016, India

#### S1. Calculation of thermal enthalpy and thermal entropy:

##### (i) $\text{SrCO}_3$ :

Change in enthalpy ( $\Delta H$ ) and entropy ( $\Delta S$ ) of  $\text{SrCO}_3$  follows the following equations:

$$\Delta H_{\text{SrCO}_3} = 21.42T + 4.28 \times 10^{-3}T^2 + 3.396 \times 10^5T^{-1} - 7905 \dots (S1)$$

$$\Delta S_{\text{SrCO}_3} = 21.42\ln T + 8.56 \times 10^{-3}T + 1.698 \times 10^5T^{-2} \dots (S2)$$

The change in enthalpy for  $\text{SrCO}_3$  cannot be obtained simply by extrapolating S1 up to 1323K, because of a phase transition of  $\text{SrCO}_3$  at 1197 K. Orthorhombic  $\text{SrCO}_3$  transitions to Hexagonal crystal structure at 1197 K. That's why  $\Delta H_{\text{SrCO}_3}$  has been calculated as-

$$\begin{aligned} \Delta H_{\text{SrCO}_3,1323} &= \Delta H_{298\text{K} \rightarrow 1323\text{K}} + \Delta H_{\text{orthorhombic} \rightarrow \text{hexagonal, at } 1197\text{K}} \\ &= 139 \text{ KJ/mol} \dots (S3) \end{aligned}$$

Similarly,  $\Delta S_{\text{SrCO}_3}$  has been calculated as-

$$\begin{aligned} \Delta S_{\text{SrCO}_3,1323} &= \Delta S_{298\text{K} \rightarrow 1323\text{K}} + \Delta S_{\text{orthorhombic} \rightarrow \text{hexagonal, at } 1197\text{K}} \\ &= 128.77 \text{ J/mol-K} \dots (S4) \end{aligned}$$

##### (ii) $\text{BaCO}_3$ :

$$\Delta H_{\text{BaCO}_3} = 20.77T + 5.85 \times 10^{-3}T^2 + 2.86 \times 10^5T^{-1} - 7670 \dots (S5)$$

$$\Delta S_{\text{BaCO}_3} = 20.77\ln T + 11.7 \times 10^{-3}T + 1.43 \times 10^5T^{-2} \dots (S6)$$

The phase transitions occur at 1079 K and 1241 K for  $\text{BaCO}_3$ . As a result of that  $\Delta H_{\text{BaCO}_3}$  and  $\Delta S_{\text{BaCO}_3}$  can be written as a similar fashion to that of equation S3 and S4.

$$\begin{aligned} \Delta H_{\text{BaCO}_3,1323} &= \Delta H_{298\text{K} \rightarrow 1323\text{K}} + \Delta H_{\text{orthorhombic} \rightarrow \text{hexagonal, at } 1079\text{K}} + \Delta H_{\text{hexagonal} \rightarrow \text{cubic, at } 1241\text{K}} \\ &= 152.57 \text{ KJ/mol} \dots (S7) \end{aligned}$$

$$\begin{aligned} \Delta S_{\text{BaCO}_3,1323} &= \Delta S_{298\text{K} \rightarrow 1323\text{K}} + \Delta S_{\text{orthorhombic} \rightarrow \text{hexagonal, at } 1079\text{K}} + \Delta S_{\text{hexagonal} \rightarrow \text{cubic, at } 1241\text{K}} \\ &= 129.08 \text{ J/mol-K} \dots (S8) \end{aligned}$$

30 **(iii) La<sub>2</sub>O<sub>3</sub>:**

31  $\Delta H_{La_2O_3,1323} = [28.86T + 0.0015T^2 + 3.275 \times 10^5 T^{-1} - 9971]_{T=1323K} = 131.67 \text{ KJ/mol}$   
 32 ... (S9)

33  $\Delta S_{La_2O_3,1323} = [28.86 \ln T + 0.003076T + 1.63 \times 10^5 T^{-2}]_{T=1323K} = 192.45 \text{ J/mol-K}$   
 34 ... (S10)

35 **(iv) CaCO<sub>3</sub>:**

36  $\Delta H_{CaCO_3,1323} = [-184.79T + 0.162T^2 + 3.688 \times 10^6 T^{-1} - (4.3 \times 10^{-5})T^3 + 7767T^{\frac{1}{2}} -$   
 37  $104608]_{T=1323K} = 120.19 \text{ KJ/mol ... (S11)}$

38  $\Delta S_{CaCO_3,1323} = [-184.79 \ln T + 0.323T + 1.844 \times 10^6 T^{-2} - (0.6485 \times 10^{-4})T^2 -$   
 39  $7767T^{-\frac{1}{2}} + 1478]_{T=1323K} = 164.13 \text{ J/mol-K ... (S12)}$

40 **(v) Na<sub>2</sub>CO<sub>3</sub> and Co<sub>3</sub>O<sub>4</sub>:**

41 The fitting parameters for the calculation of  $\Delta H$  and  $\Delta S$  for Na<sub>2</sub>CO<sub>3</sub> and Co<sub>3</sub>O<sub>4</sub> in the  
 42 temperature range 298 K to 1323 K has been tabulated in table S1, which follows equation 2  
 43 and 3 of the main manuscript.

44 Table S1. The values of A, B, C, D, E, F, G and H<sub>f</sub> of Na<sub>2</sub>CO<sub>3</sub> and Co<sub>3</sub>O<sub>4</sub>.

| Oxides                          | Temp, Range | A           | B                   | C                  | D                         | E                  | F           | G       | H <sub>f</sub> |
|---------------------------------|-------------|-------------|---------------------|--------------------|---------------------------|--------------------|-------------|---------|----------------|
| Na <sub>2</sub> CO <sub>3</sub> | 298-723     | 175.2       | -348.1              | 743.1              | -305.6                    | -1.63              | -1179       | 415.06  | -1130.7        |
|                                 | 723-1123    | -1067       | 2469.3              | -1829.1            | 505.7                     | 100.2              | -607.1      | -1356.4 |                |
|                                 | 1123-1323   | 189.5       | -7×10 <sup>-6</sup> | 2×10 <sup>-6</sup> | -<br>5.2×10 <sup>-9</sup> | 3×10 <sup>-6</sup> | -<br>1183.1 | 343     |                |
| Co <sub>3</sub> O <sub>4</sub>  | 298-1323    | 177.0<br>95 | -<br>100.43         | 185.78             | -49.05                    | -3.48              | -<br>971.54 | 331.28  | -910           |

45

46 By putting the fitting parameter values from the table, change of enthalpy for Na<sub>2</sub>CO<sub>3</sub>  
 47 ( $\Delta H_{Na_2CO_3,1323}$ ) and Co<sub>3</sub>O<sub>4</sub> ( $\Delta H_{Co_3O_4,1323}$ ) has been calculated in equation S13 and S14.

48  $\Delta H_{Na_2CO_3,1323} = 176.4 \text{ KJ/mol ... (S13)}$

49  $\Delta H_{Co_3O_4,1323} = 194.2 \text{ KJ/mol ... (S14)}$

50 Similarly, entropy change for the above-mentioned oxides has been written in equation S15  
 51 and S16.

52  $\Delta S_{Na_2CO_3,1323} = 256.2 \text{ J/mol K} \dots (S15)$

53  $\Delta S_{Co_3O_4,1323} = 251 \text{ J/mol K} \dots (S16)$

54 **(vi) HEP:**

55 Table S2: Variation of specific heat with temperature.

| Temperature<br>(t=T/1000) (K) | Specific heat (J/mol<br>K) |
|-------------------------------|----------------------------|
| 0.37341                       | 152.58626                  |
| 0.42324                       | 141.75865                  |
| 0.47328                       | 135.30894                  |
| 0.52331                       | 125.85744                  |
| 0.57319                       | 122.80999                  |
| 0.62318                       | 120.30945                  |
| 0.67306                       | 115.57576                  |
| 0.72325                       | 109.89884                  |
| 0.77301                       | 114.46133                  |
| 0.82323                       | 117.8193                   |
| 0.87323                       | 123.07239                  |
| 0.92331                       | 123.20704                  |
| 0.97311                       | 126.40214                  |
| 1.023                         | 126.40214                  |

56

57

58 **S2. Thermal conductivity:**

59 To evaluate the thermal conductivity of the BSCLN sample thermal diffusivity (D), specific  
60 heat ( $C_p$ ) and density ( $\rho$ ) are measured in the temperature range of 323 K to 1023 K. Thermal  
61 conductivity is calculated by using the following equation (S17):

62 
$$K = \rho C_p D \dots (S17)$$

63 Wiedemann Franz law ( $ke = L\sigma T$ ) has been used to calculate the electronic thermal  
64 conductivity of the BSCLN sample where the temperature dependent Lorentz number has  
65 been calculated using the equation (S18):

66 
$$L = 1.5 + \exp\left[-\frac{|S|}{116}\right] \dots (S18)$$

67

68

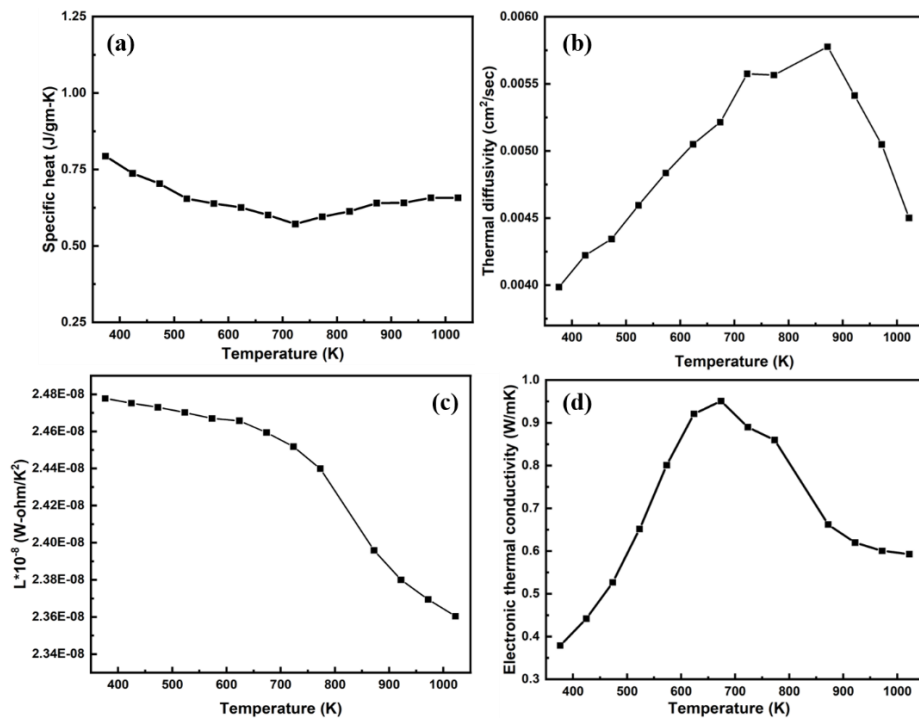

69

70 Fig. S1: (a) Specific heat ( $C_p$ ), (b) thermal diffusivity ( $D$ ), (c) Lorentz's number and (d)  
71 electronic thermal conductivity of BSCLN ceramics.

72

73
